# Supplementary material
Source: publisher figshare collection journal article supplement (https://tandf.figshare.com/ndownloader/files/16970918)
Supplement: Supplementary file 1 [file 16970918]

| **Time period** | **Energy** | **Climate** |
| --- | --- | --- |
| 2001 – 2006 | Energy sector program (2001-2006): non-quantified goal of contributing to the reduction of GHG emissions | N.a. |
| 2007 | N.a. | National climate change strategy (2007 – 2012): Based on existing energy programs, no quantified goals |
| 2008 | Energy sector program (2007-2012): increasing renewable energies from 23% in 2006 to 26% in 2012 and reducing emissions by 28 MTCo2 in 2012. |  |
| 2008 | Renewable energy law of 2008 (LAERFTE) : 35 % of RE in 2024, not converted into GHG equivalents |  |
| 2009 |  | Special climate change program (2009 – 2012): based on energy sector program (2007 - 2012) and LAERFTE. Mitigation target (total energy sector): - 29,9 MTCO2 in 2012 |
| 2012 |  | General climate change law (2012): conditional mitigation target of 30% below business as usual by 2020 and 50 % GHG emissions reduction by 2050 compared to 2000. Electricity generation from clean energy sources should reach 35% by 2024. |
| 2013 | Sectoral program energy (2013-2018): no GHG indicator |  |
| 2014 | Program for sustainable energy use (2014-2018): no GHG indicator |  |
| 2014 | Program for renewable energy use (2014-2018): no GHG indicator | Special program on climate change (2014 – 2018): - 83 MtCO2e until 2018 through measures in the energy sector. |
| 2015 | Law for the energy transition: 35% of clean energies in the national energy matrix by 2024. Climate policy targets of the LGCC should be supported. | NDC mitigation goal until 2030: unconditional -22 % BAU and conditional -36 %. For the electricity sector: -31 % of GHG emission reduction until 2030. |
